# Supplementary material for: Multi-Modal Multi-Spectral Intravital Microscopic Imaging of Signaling Dynamics in Real-Time during Tumor–Immune Interactions
Source: Cells. 2021 Feb 26;10(3):499. doi: 10.3390/cells10030499 (PMC7996937; doi:10.3390/cells10030499)
Supplement: Supplementary file 1 [file cells-10-00499-s001.pdf]

## Supplemental Materials

### Supplemental Figures

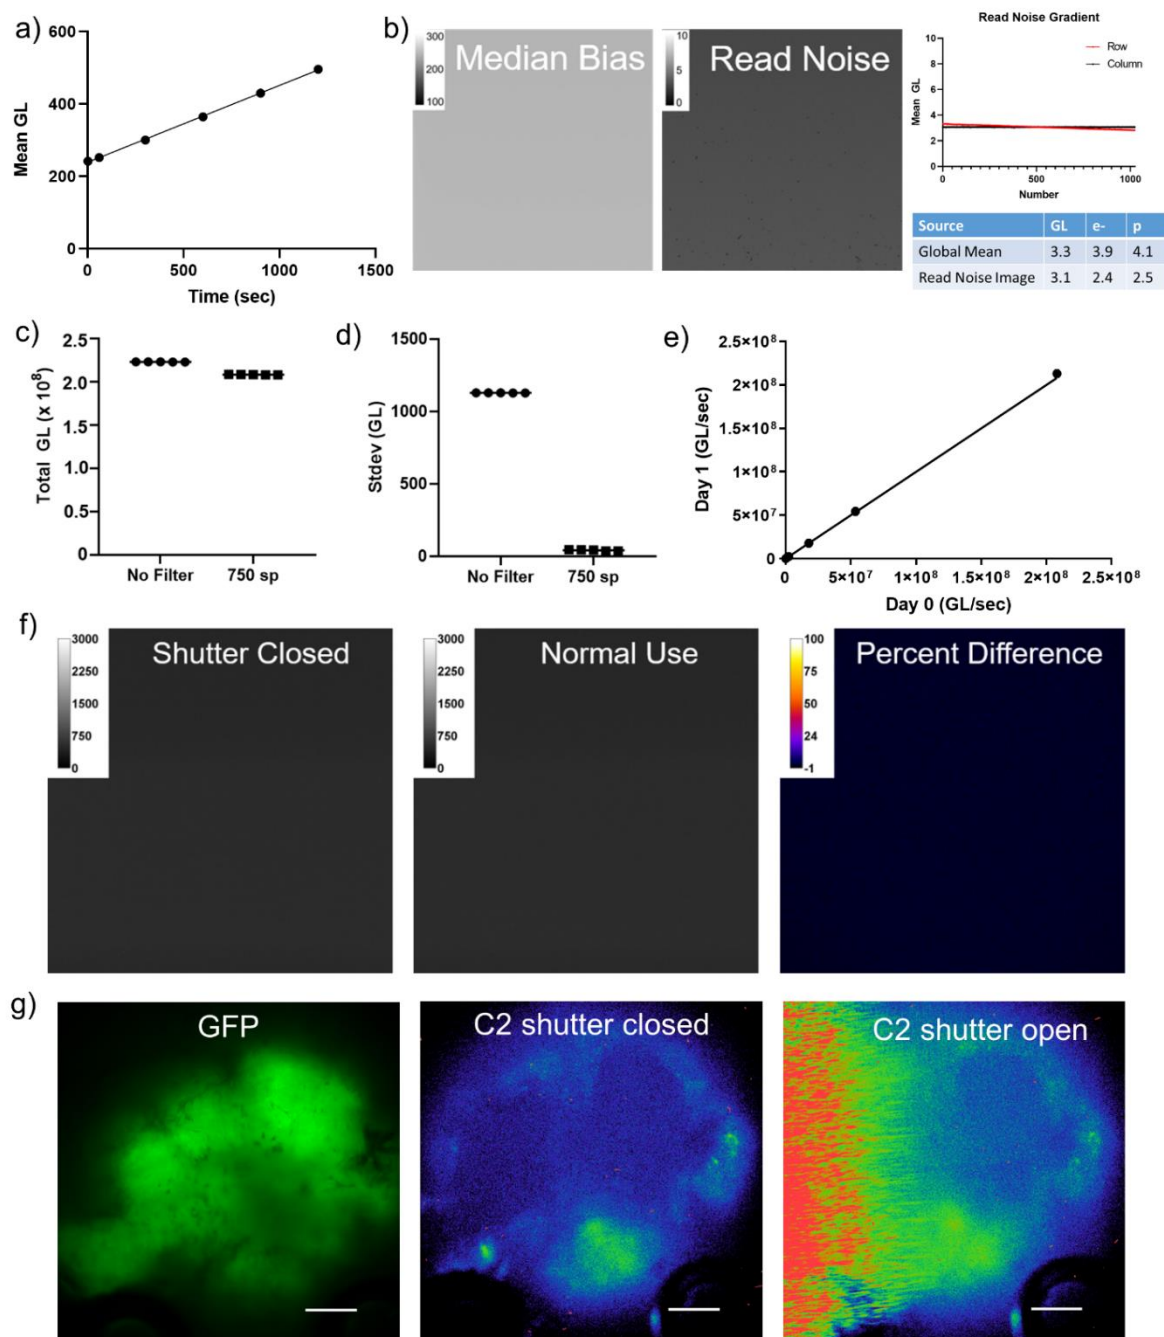

**Figure S1.** Quantification of the elimination of stray light sources. **(a)** Images were acquired with the camera shutter closed to establish mean dark current. Light quantified as grey levels (GL) vs time ( $n = 5$  images per time) was plotted, yielding a slope of 0.208 mean GL/(sec\*pixel),  $R^2 = 0.999$ ; data were expressed as mean  $\pm$  SEM (error bars fall within the data point). **(b)** Camera characterization of read noise globally and on a per pixel basis with the camera shutter closed; read noise was well controlled (3 GL) with very small but detectable top to bottom and left to right gradients in read noise:  $4.9 \times 10^{-4}$  GL/pixel and  $1.810^{-6}$  GL/pixel, respectively. Quantification of the **(c)** total GL of images and **(d)** standard deviation (Stdev); 2X objective, 20 min acquisition with the 750 nm short pass filter (750 sp)

and without the filter (No Filter). (e) Light standard measurements ( $n = 5$ ) on day 0 and day 1 plotted against each other; linear fit had a slope of 1 indicating excellent day to day test-retest agreement ( $n = 5$  images, data were expressed as mean  $\pm$  SEM (error bars fall within the data point)). (f) Representative stress test images (2X objective, 20 min acquisition,  $n = 5$  images per group) with camera shutter closed and open (normal use); the difference between normal use and shutter closed images was calculated and displayed on a pixel wise basis as percent difference. (g) Representative intravital images of skin window chamber-bearing animals of tumor GFP (GFP cube, 1 s exposure) and bioluminescent tumor NF- $\kappa$ B transcriptional activation with the C2 shutter closed and open ((BLI, 20 min acquisition, open filter) at 2X; scale bar represents 1000  $\mu$ m).

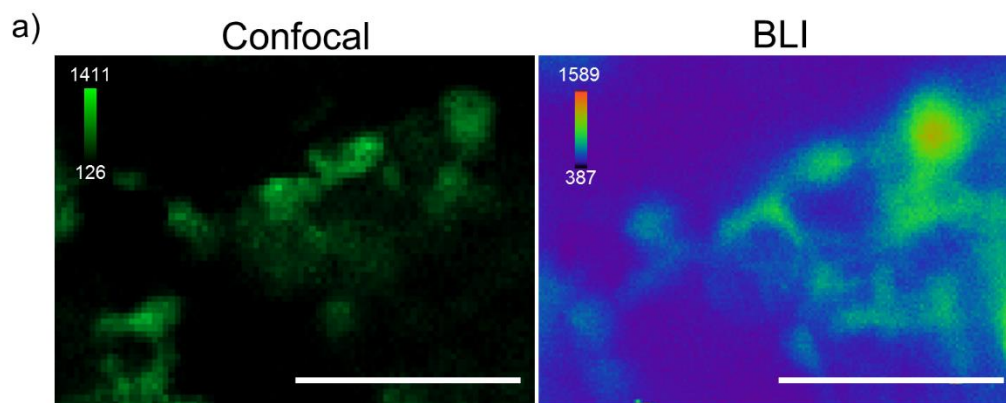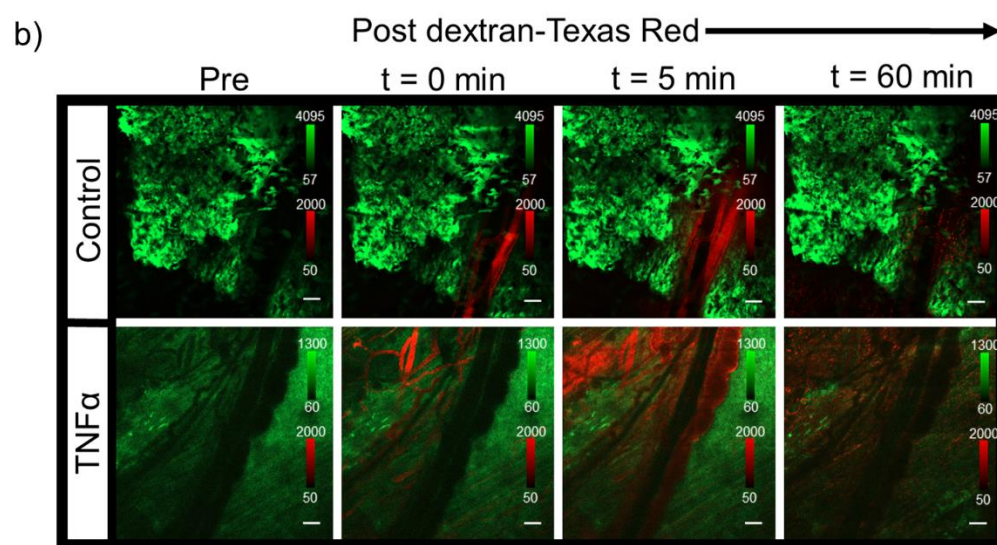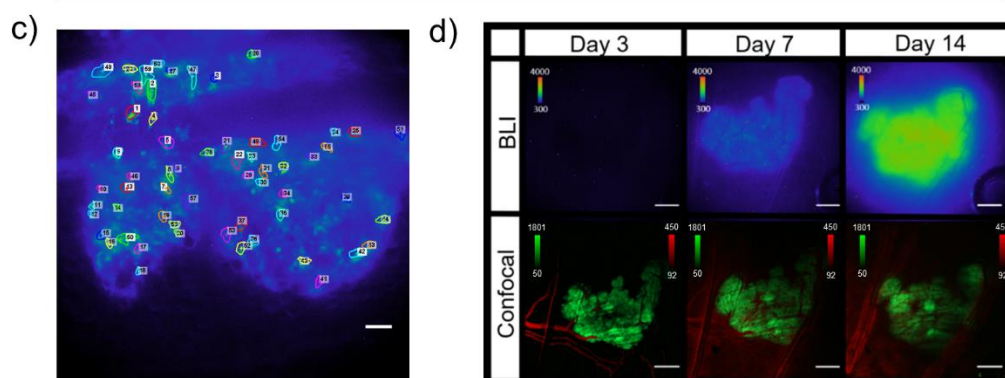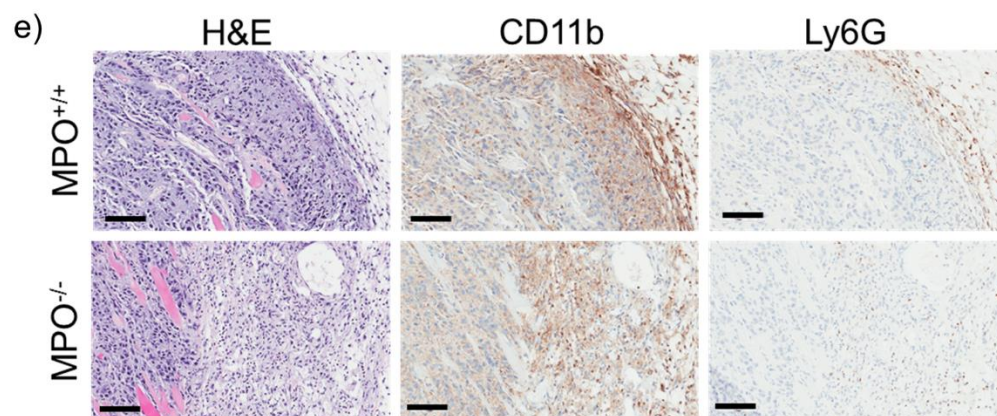

**Figure S2.** Intravital imaging of skin window chamber-bearing animals of tumor NF- $\kappa$ B transcriptional activation. **(a)** Representative intravital image of B16F10  $\kappa$ B-FLuc GFP tumors in C57BL/6 window chamber-bearing animal using confocal imaging of tumor cells (green) and corresponding NF- $\kappa$ B bioluminescence (BLI) image (10X objective, scale bar represents 200  $\mu$ m). **(b)** Representative time course intravital images of B16F10  $\kappa$ B-FLuc GFP tumors in C57BL/6 window chamber-bearing animal using confocal imaging of tumor (green) and vasculature (red) fluorescence following i.v. injection of dextran-Texas Red alone (control) and with TNF $\alpha$  (10X objective, 4.8 speed, laser lines: 488 nm (GFP, tumor) and 561 nm (dextran-Texas Red, vasculature); scale bar represents 100  $\mu$ m). **(c)** Representative image of ROIs used to quantify  $\kappa$ B-FLuc bioluminescence of single tumor cells and cluster of tumor cells within a bulk tumor at 10X. **(d)** Representative intravital images of C57BL/6 window chamber-bearing animal with B16F10 NF- $\kappa$ B-FLuc Dendra2 tumor growth over time; bioluminescence (BLI, 20 min acquisition, open filter) and Dendra2 epifluorescence (GFP cube, 1 s exposure) at 2X; scale bar represents 1000  $\mu$ m. **(e)** Representative immunohistology of *MPO*<sup>+/+</sup> and *MPO*<sup>-/-</sup> window chamber skin flaps at endpoint showing H&E, CD11b and Ly6G staining confirming presence of myeloid cells (20X; scale bar, 100  $\mu$ m).

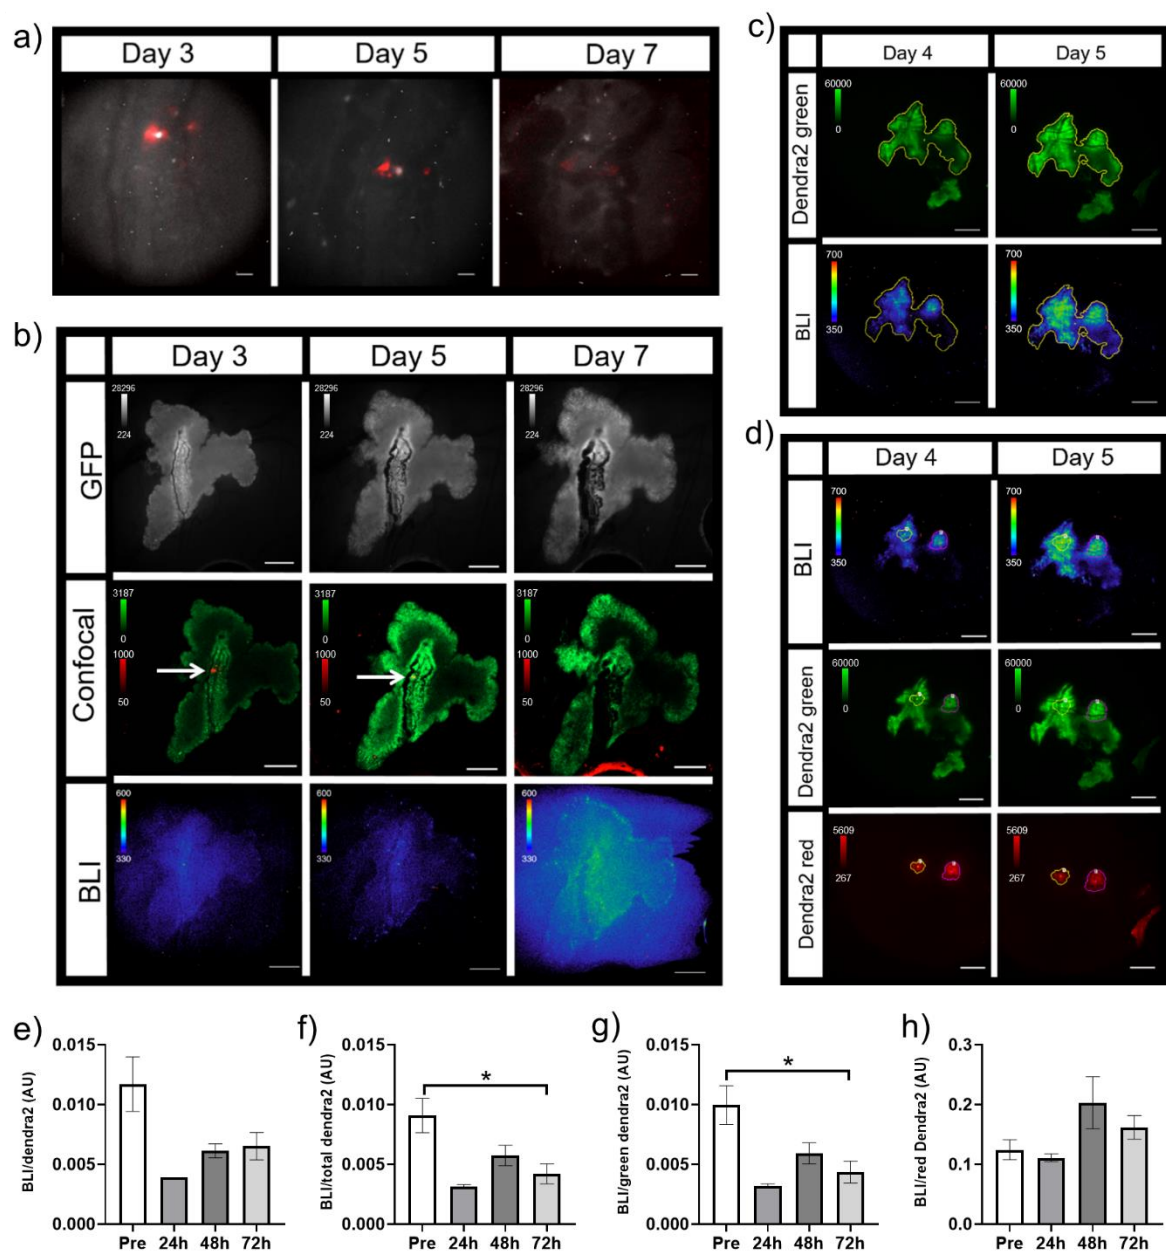

**Figure S3.** B16F10 Dendra2 photoconversion in skin window chamber-bearing animals. (a) Representative intravital images over time of photoswitched Dendra2 (red, confocal image: 4.8 speed, laser line 561 nm) overlaid with corresponding bioluminescent image (BLI, 20 min acquisition, open filter) at 10X; scale bar represents 100  $\mu$ m. (b) Representative intravital image of B16F10 NF- $\kappa$ B-FLuc Dendra2 tumors over time following single cell 405 nm confocal laser photoconversion of Dendra2 epifluorescence (GFP cube, 2 s exposure), merged Dendra2 confocal image (4.8 speed, laser lines: 488 nm (green unphotoconverted Dendra2) and 561 nm (red photoconverted Dendra2)) and NF- $\kappa$ B-FLuc bioluminescence (BLI, 20 min acquisition, open filter) at 2X; white arrow identifies photoswitched cell; scale bar represents 1000  $\mu$ m. (c) Representative image of auto threshold ROIs of whole tumor showing unphotoconverted Dendra2 fluorescence (Dendra2 green) and (d) photoconverted areas within the same tumor using photoconverted Dendra2 fluorescence (Dendra2 red). (e) Normalization of quantified bioluminescent NF- $\kappa$ B signal using Dendra2 fluorescent intensity of green unphotoconverted Dendra2 from total tumor area. Quantified bioluminescent NF- $\kappa$ B signal normalized to Dendra2 fluorescent intensity of the photoconverted tumor areas using (f) sum of unphotoconverted green and photoconverted red Dendra2 fluorescence, (g) green unphotoconverted Dendra2 only, and (h) red photoconverted Dendra2 only (data are represented as mean  $\pm$  SEM,

statistical significance calculated using mixed-effects analysis with Dunnett's multiple comparisons  
\*  $P < 0.05$ ).

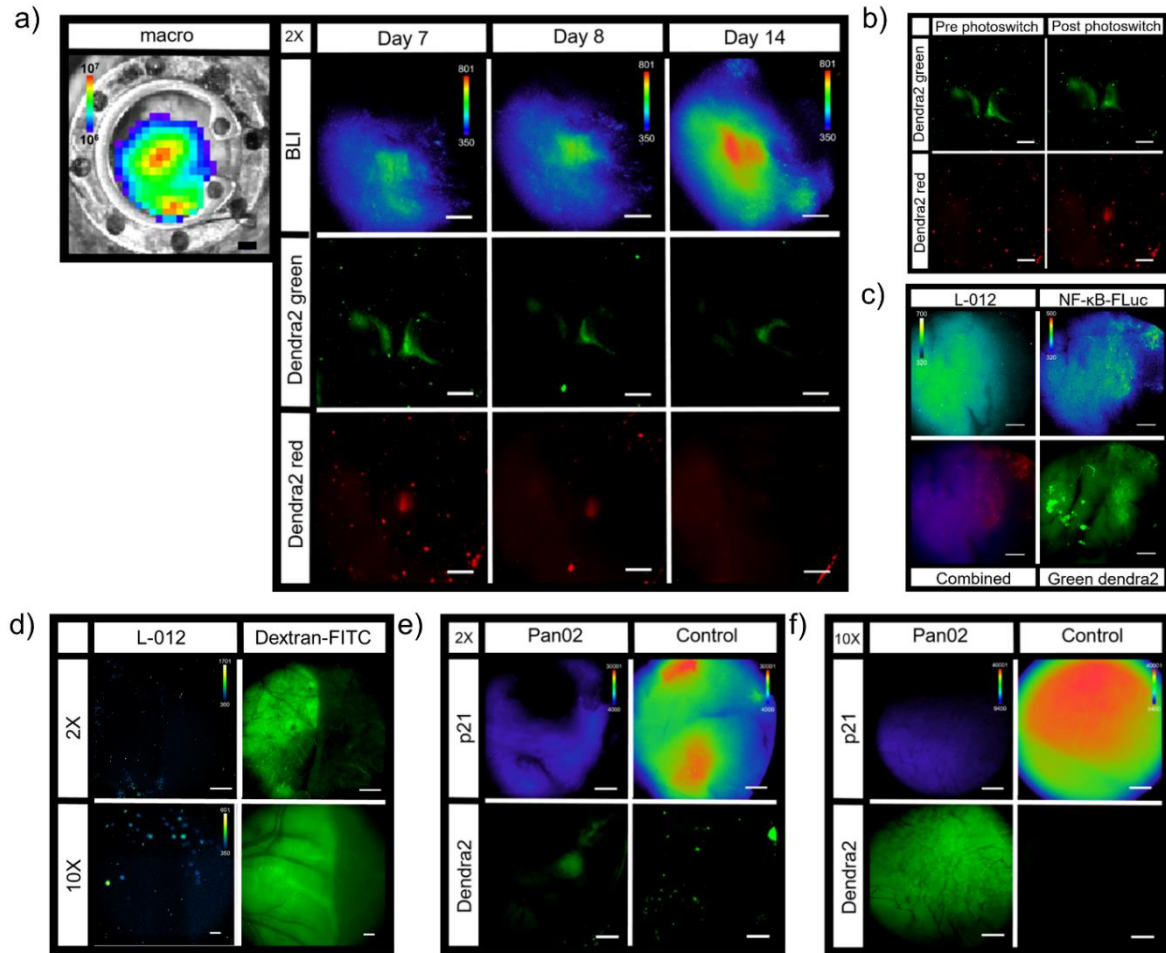

**Figure S4.** Intravital microscopy of abdominal window chamber animals. **(a)** Representative intravital images of the pancreas using wild type C57BL/6 abdominal window chamber animals with Pan02 NF-κB-FLuc Dendra2 pancreatic tumors. NF-κB-FLuc bioluminescence and Dendra2 fluorescence images of implanted Pan02 pancreatic tumor progression imaged by macro-image (macro) and over time at 2X (BLI, 10 min acquisition, open filter; Dendra2 green, GFP cube, 2 s exposure; Dendra2 red, DsRed cube, 5 s; scale bar represents 1000 μm). **(b)** Representative fluorescent image of Pan02 tumor pre- and post-photoswitching (DAPI cube, 10 min exposure) at 2X objective (Dendra2 green, GFP cube, 2 s exposure; Dendra2 red, DsRed cube, 5 s; scale bar represents 1000 μm). **(c)** Representative intravital images of resolved bioluminescence of L-012 innate immune cell activity and Pan02 NF-κB-FLuc reporters (2X objective, sequential imaging of L-012 (20 min acquisition, open filter) and NF-κB-FLuc (10 min acquisition, open filter)), overlaid image of bioluminescent reporters (combined; pseudocolored), and tumor Dendra2 (Dendra2 green, GFP cube, 2 s exposure); scale bar represents 1000 μm. **(d)** Representative intravital images of the pancreas in control KPC transgenic animals implanted with an abdominal window chamber showing L-012 bioluminescence (20 min acquisition, open filter) and vasculature following i.v. injection of dextran-FITC (200,000 MW, 4 mg/mL; 2X, 5 sec exposure; 10X, 1 sec exposure); scale bar represents 1000 μm and 100 μm, respectively, n = 2 animals. **(e, f)** Representative intravital images of the pancreas in *p21-Fluc* transgenic reporter animals implanted with an abdominal window chamber and a Pan02 Dendra2 tumor (Pan02) or without a tumor (control) at day 13 post implantation. Reporter *p21* promoter activation is monitored by FLuc bioluminescence following D-luciferin injection and Pan02 tumor mass monitored using Dendra2 fluorescence at **(e)** 2X (*p21* BLI, 5 min acquisition, open filter; Dendra2, GFP cube, 5 sec exposure; scale bar represents 1000 μm) and **(f)** 10X (*p21* BLI, 10 min acquisition, open filter; Dendra2, GFP cube, 1 sec exposure; scale bar represents 100 μm); n = 2 animals per group.
